# Supplementary figures and images for: Identification of Key Functional Modules and Immunomodulatory Regulators of Hepatocellular Carcinoma
Source: Hindawi journal article supplement (doi:10.1155/2021/1801873), 2021-08-13

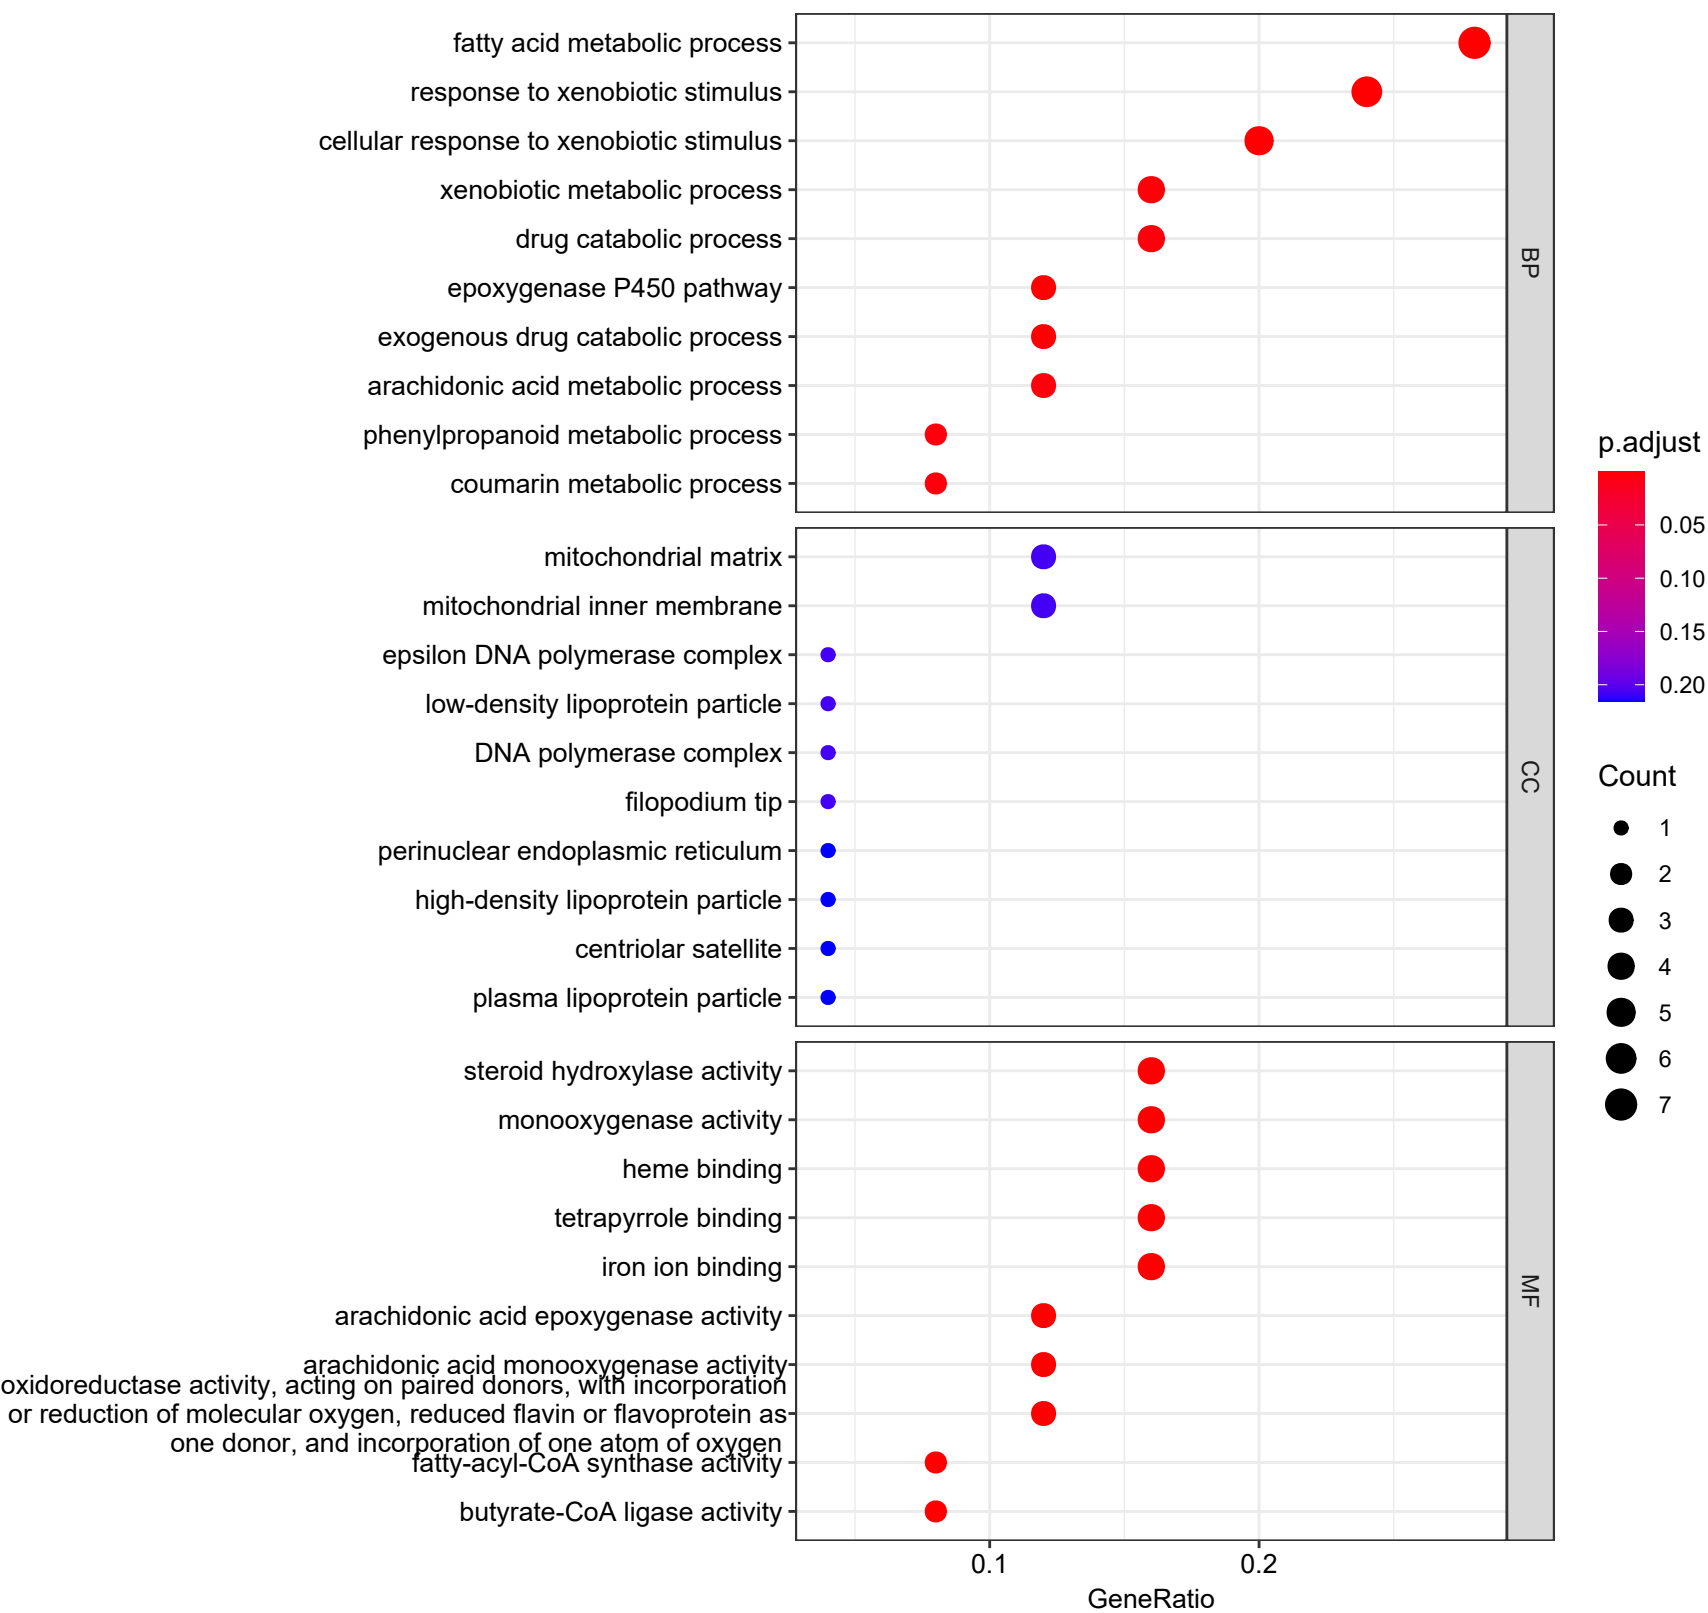

Supplement: f1 [file 1801873.f1.zip]

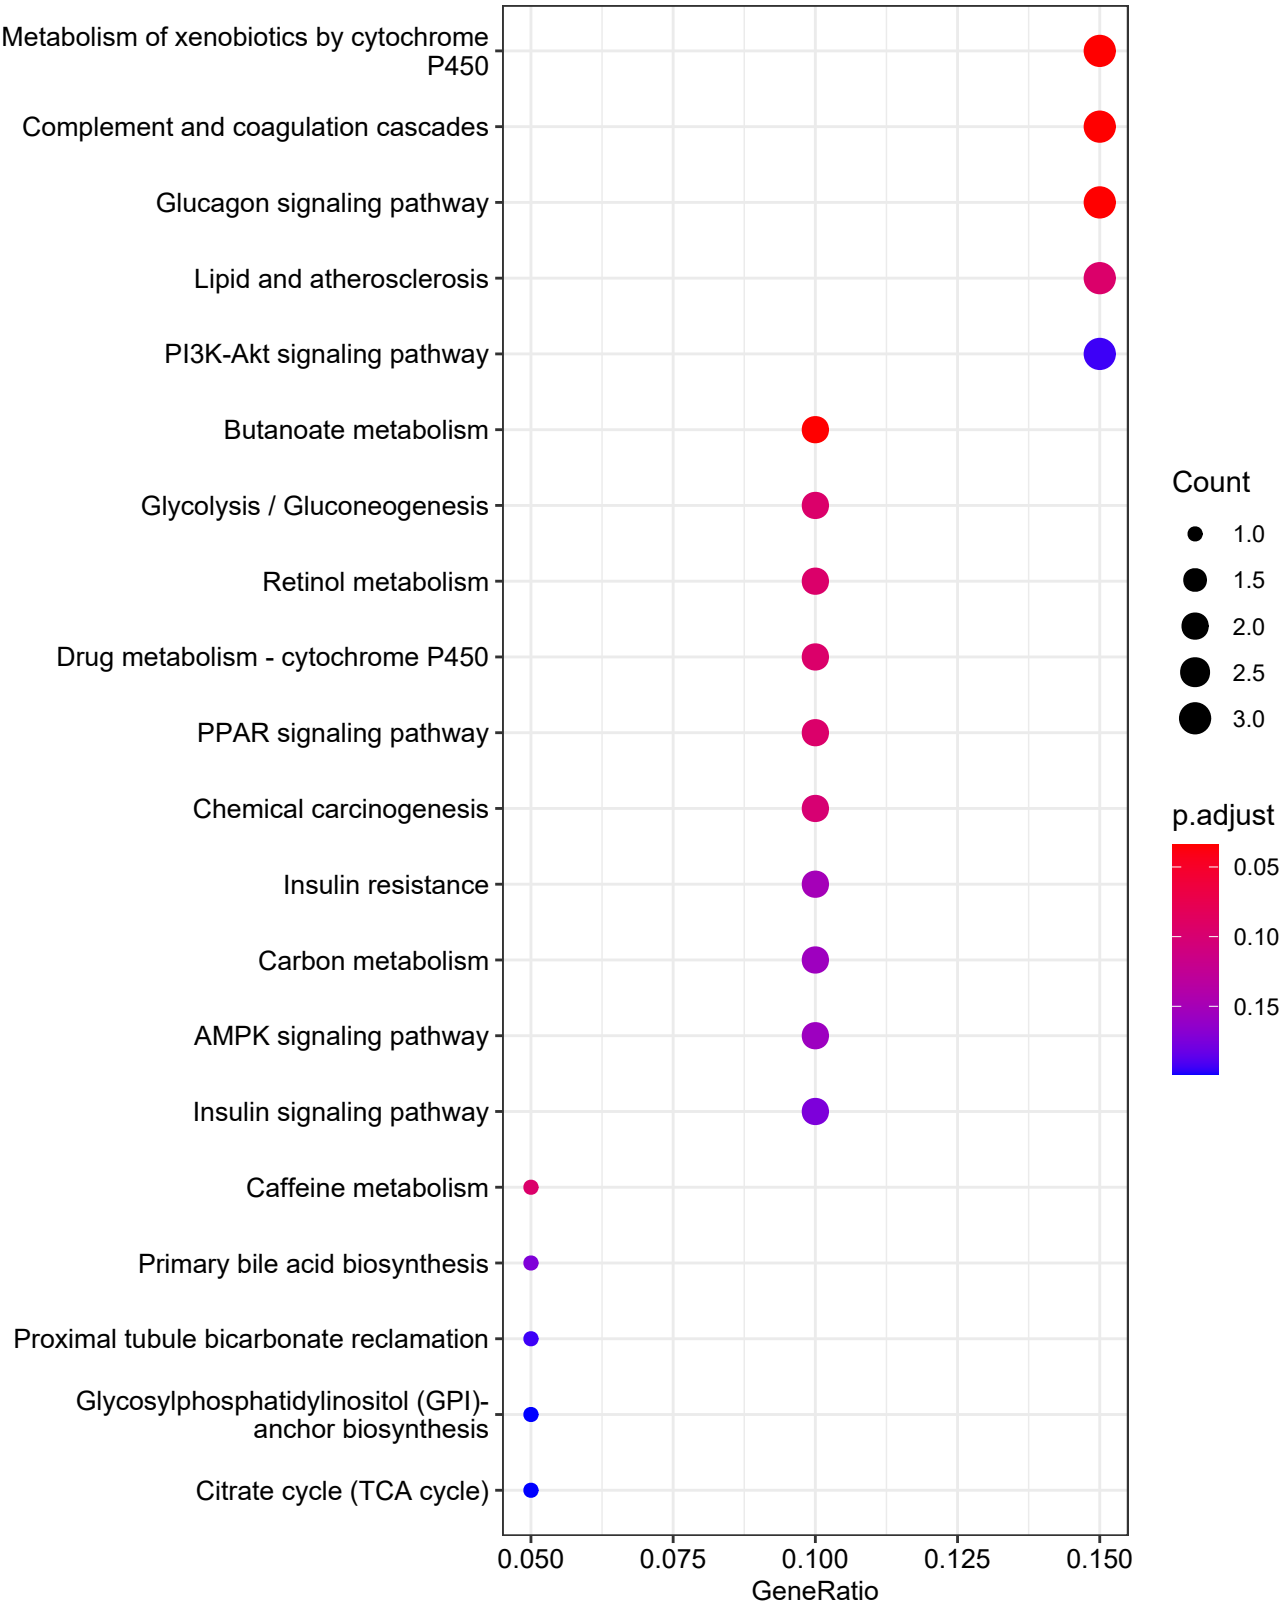

Supplement: f1 [file 1801873.f1.zip]
